# Supplementary material for: Human Frame Shift Mutations Affecting the Carboxyl Terminus of Perilipin Increase Lipolysis by Failing to Sequester the Adipose Triglyceride Lipase (ATGL) Coactivator AB-hydrolase-containing 5 (ABHD5)
Source: PubMed Central journal article supplement — J Biol Chem. 2011 Jul 12;286(40):34998–5006. doi: 10.1074/jbc.M111.278853 (PMC3186430; doi:10.1074/jbc.m111.278853), 2011-07-12
Supplement: supp_M111.278853_jbc.M111.278853-3.pdf [file supp_M111.278853_jbc.M111.278853-3.pdf]

A

|             |      |                                                                                             |      |
|-------------|------|---------------------------------------------------------------------------------------------|------|
| PLIN1 HUMAN | 181  | IGSIEKVEYFLPADKESAPAFGHQQAQKS-----FKAKPSLISRVGALNNTLSRYTVTMMARATEQGHVFM-----WIPGVVHSSSLA    | 261  |
| PLIN1 MOUSE | 181  | IGSIEKVEFLPDPKESAPSSG-RQRTQKA-----FKAKPSLVRVSTLANTLSRHTMATTAWADKQGHSLM-----WIPGVVHSSSLA     | 260  |
| PLIN2 HUMAN | 180  | IKSELEVEQYHPLTEEELEKEDKKVEGFDL-----VQKPSYVRLGSLSTKLSHRAYQALSRVKEAKQKSQQTISCHSTVHLIEFA       | 263  |
| PLIN2 MOUSE | 178  | IKSPMLVIQYHPLTQEELEMDKKVEGFDL-----VQKPSNMRLESLSLTKLCSRAMHQALS RVKEAKQKSQQTISCHSTVHLIEFA     | 261  |
| PLIN3 HUMAN | 193  | ICKSEEWAINHPLITTEFLARITSLDGFIVASVQQCRQEQSYEVRLGSLSERLRQHAYEHSIGKIRATRQRQAELLQISQALSIMETV    | 282  |
| PLIN3 MOUSE | 197  | IVKSDAWAINRPLITTEFLALITPPEDSDIASLQQCRQEQNYEVRLGSLSERLRNHAYEHSIGKIQNARQKQQTLCQHTSVGLMESV     | 286  |
| PLIN4 HUMAN | 1139 | QNELEGLGIIIFEMNPEEQAQIPLASQPGPKLSA-----EQGSEYVRLGDTGPFSTRQRAEHAHSVHCHGGQFCARDTLAQIQDCFLTEKA | 1224 |
| PLIN5 HUMAN | 155  | EKSEPEVHIFEMVTEFLAALDAEAEGPEVGSVEDCRQQGYEVRLGSLSARLRHLYAHSVGVKIRQSKHRRQDTLAHQIQTETFLIDHM    | 244  |
| 2nd Struct  | 197  |           | 281  |
| H Cleft     | 197  |           | 286  |
| Sub-domains | 197  |           | 286  |
|             |      |                                                                                             |      |
| PLIN1 HUMAN | 262  | QWASVAMCAISRRRSEVVRVWIHSLAAACEEDHEDCTDTEGEITEE---EETELETEENKFESEVALPGPRGILGGVAHILCKLQITIS   | 348  |
| PLIN1 MOUSE | 261  | QWASAAACVYSRRCEVVRVWIHNLAASQDESHDDCTDTEGEFTDDEEEEESEAEENVLREVITALPNPRGILGGVVHIVCNLRNTIS     | 350  |
| PLIN2 HUMAN | 264  | RKNVYSANCKIQDAQIKLYLSVVEWKRISICYDDTDES-----HCAEHIESRTIATARNITQCLCTCHILIS                    | 330  |
| PLIN2 MOUSE | 262  | RKNMHSANCKIQGACIKLYVSVVEWKRISICYDDTDES-----HCVEHIESRTIATARNITQCLCTCQITVIV                   | 328  |
| PLIN3 HUMAN | 283  | KQGV---DCKVEGCEKHQMNLSWNQKQIQGPEKEF-----FKPEQVESRAITFRIDIAQLQACTSIGE                        | 346  |
| PLIN3 MOUSE | 287  | KQGV---DCKVEGCEKHQMNLSWNQKTEQDAEKDE-----AKPEQVEARALSMFRITITQCLQSMCVVIGA                     | 350  |
| PLIN4 HUMAN | 1225 | QQAP---EGQPRLDGSG-----ASA-----EDA-----AVQEEFDAGVLSFVCGLLRGLHTAYSGLVS                        | 1275 |
| PLIN5 HUMAN | 245  | QQGV---TFTAPARPKVHELIGEWGQRP-----PES-----RRRSQAELETIVISRSITQCLCGVEMTES                      | 303  |
| 2nd Struct  | 282  |           | 344  |
| H Cleft     | 287  |           | 350  |
| Sub-domains | 287  |           | 350  |
|             |      |                                                                                             |      |
| PLIN1 HUMAN | 349  | ANTWAEAAVLMAGRVLHLTPAFA-----VSSTKGRAMSLSDALKGVTLNVVDTVVHYVPPLPRLSIMBESEFERDI                | 419  |
| PLIN1 MOUSE | 351  | ANTWAEAAVLTGVRILHLTPAFA-----VSSTKGRAMSLSDALKGVTLNVVDTVVHYVPLPRLSIMBESEFERDI                 | 421  |
| PLIN2 HUMAN | 331  | NQGVVEQNIQDQAKHGMVAGDIYSVVERNAASEFKEVSDSLTSSGQLQKMKESLDVMDYLVNNTPIINLVG---PFYPCLTE          | 411  |
| PLIN2 MOUSE | 329  | NQGVVEQNIQDQAKHGMVAGDIYSVVERNAASEFKEVSDGVLTSSTGQLQKMKESLDVMDYFVNNTPIINLVG---PFYPCLTE        | 409  |
| PLIN3 HUMAN | 347  | SIQGLEITNKDQVQQARRQVEDIQATEFSSIHSEFQDSSSITAQSERVASAREALDHVVEYVAQNTPEVNLVG---PFAPGITE        | 427  |
| PLIN3 MOUSE | 351  | SIQGLEISHVREQAQQARSQVNDIQATEFSGIHSEFQDSAGVLAQTRERARAREALNTVEYVAQNTPEVNLVG---PFAPGITE        | 431  |
| PLIN4 HUMAN | 1276 | SIQGLEIAEIQQPVGRARHSLCEIYGVIVASAGSVEEFAERIVQSEGVHQAWQGEQLTEGLQHNEPISNLVG---PFAL----         | 1352 |
| PLIN5 HUMAN | 304  | SIWGLEIAGAQEKVAEVRRSVDAIQTAFAADARCFRDIFAAAIAEGGRVAHAHACVLELELVVQAVELPVLVG---PFAPILVE        | 384  |
| 2nd Struct  | 345  |           | 408  |
| H Cleft     | 351  |           | 431  |
| Sub-domains | 351  |           | 431  |

B

PERI\_Human-WT <sup>397</sup>TVVHYVP L P R L S L MEPE S EF RDI <sup>419</sup>  
 PERI\_Human-p.Leu404fs <sup>397</sup>TVVHYVPA V ADG ARE R I PGHRQP <sup>419</sup>  
 PERI\_Human-p.Val398fs <sup>397</sup>TGALRAAP Q AVA D GARE R I PGHR <sup>419</sup>
