# Supplementary figures and images for: Human Frame Shift Mutations Affecting the Carboxyl Terminus of Perilipin Increase Lipolysis by Failing to Sequester the Adipose Triglyceride Lipase (ATGL) Coactivator AB-hydrolase-containing 5 (ABHD5)
Source: PubMed Central journal article supplement — J Biol Chem. 2011 Jul 12;286(40):34998–5006. doi: 10.1074/jbc.M111.278853 (PMC3186430; doi:10.1074/jbc.m111.278853), 2011-07-12

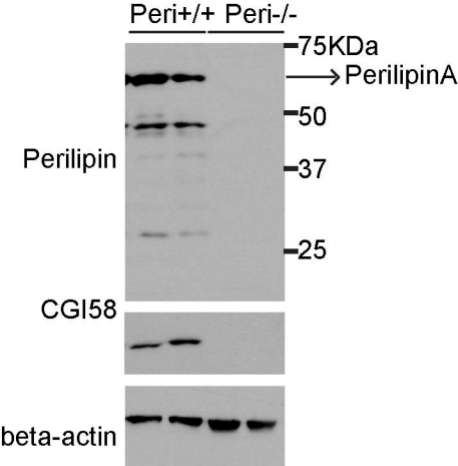

Supplementary Figure 1

Supplement: supp_M111.278853_jbc.M111.278853-1.pdf [file supp_M111.278853_jbc.M111.278853-1.pdf]

A

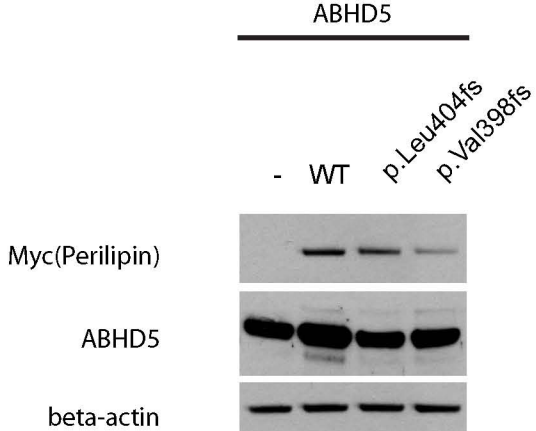

B

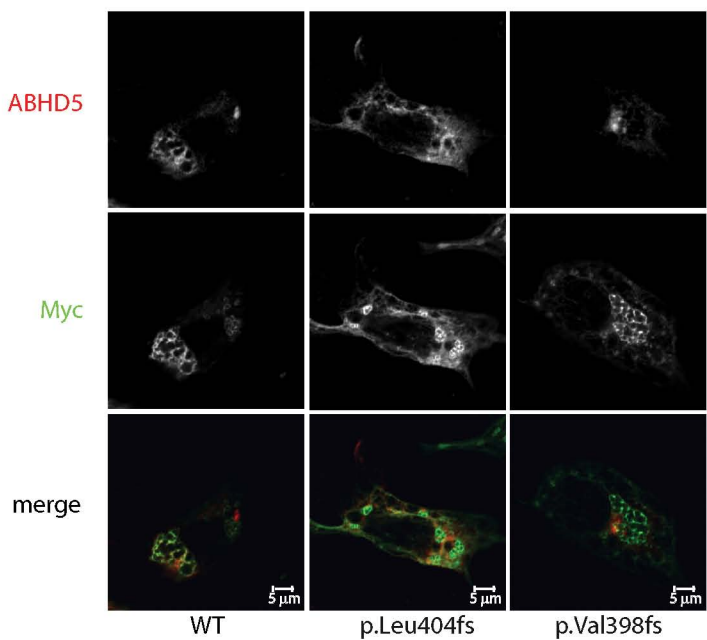

Supplementary Figure 2

Supplement: supp_M111.278853_jbc.M111.278853-2.pdf [file supp_M111.278853_jbc.M111.278853-2.pdf]
